# Supplementary material
Source: publisher site journal article supplement (https://www.dovepress.com/article/217710)
Supplement: Supplementary file 1 [file get_supplementary_file.php]

**Supplementary Figure 1.** Search strategy flow diagram


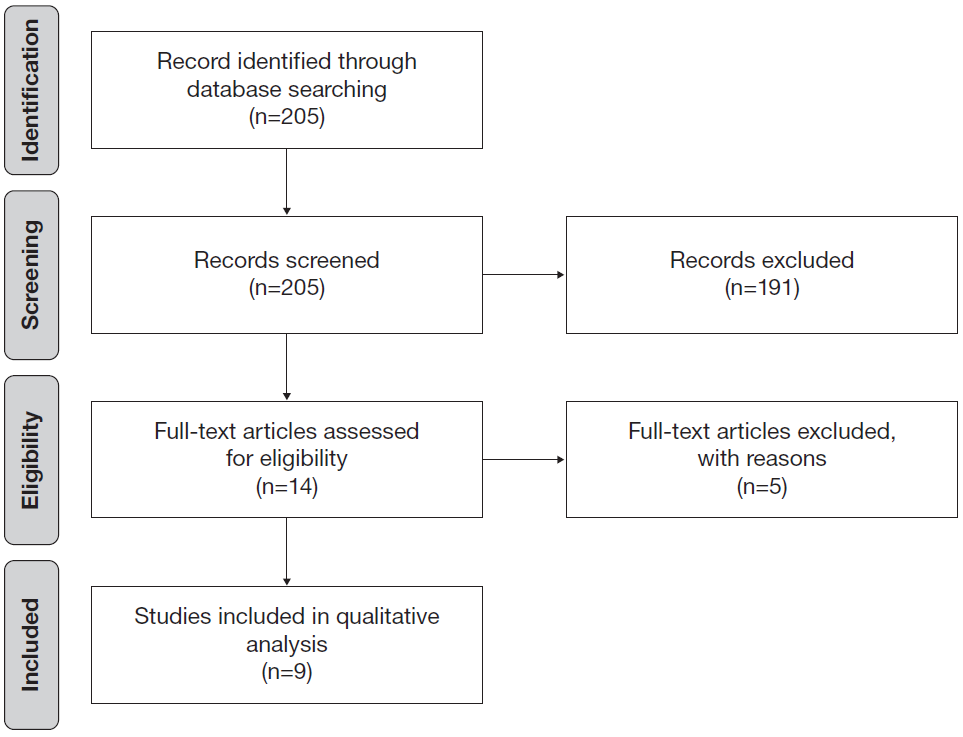


Searches were conducted in PubMed in October 2018.

Search terms were as follows:

COPD[Title/Abstract] AND (treatment-naïve[Title/Abstract] OR treatment naïve[Title/Abstract] OR naïve to maintenance therapy[Title/Abstract] OR naïve to maintenance treatment[Title/Abstract] OR maintenance-naïve[Title/Abstract] OR maintenance naïve[Title/Abstract] OR LABA-naïve[Title/Abstract] OR LABA naïve[Title/Abstract] OR LAMA-naïve[Title/Abstract] OR LAMA naïve[Title/Abstract] OR prior treatment[Title/Abstract] OR prior therapy[Title/Abstract] OR inexperienced[Title/Abstract] OR first maintenance)
